# Supplementary material
Source: Research Square preprint supplement (doi:10.21203/rs.3.rs-9074163/v1)
Supplement: Supplementary file 1 [file fff4dd4cacdac9f4be9a34d1.docx]

**Supplementary materials: univariable and multivariable regression analyses and multicollinearity assessments**

**Supplementary Table 1** Assessment of Multicollinearity among Candidate Variables for Cumulative Live Birth Rate Per Initiated Cycle

| **Variable** | **GVIF** | **Df** | **GVIF^[1/(2×Df)]** |
| --- | --- | --- | --- |
| Infertility type | 1.163921 | 1 | 1.078852 |
| Protocol | 1.236108 | 2 | 1.054421 |
| AMH | 1.16114 | 1 | 1.077562 |
| AFC | 1.231181 | 1 | 1.109586 |
| Age | 3.236145 | 1 | 1.798929 |
| POSEIDON group | 3.099662 | 1 | 1.760586 |
| Infertility duration | 1.036244 | 1 | 1.017961 |
| bFSH | 1.185428 | 1 | 1.088774 |
| bLH | 1.018276 | 1 | 1.009097 |

Note:

Multicollinearity assessment of candidate variables (*p* < 0.2 in univariable analysis). GVIF^[1/(2×Df)] represent the adjusted GVIF, with values < 5 indicating no substantial multicollinearity.

Abbreviations: GVIF, generalized variance inflation factor; Df, degrees of freedom; AMH,

Anti-Müllerian Hormone; AFC, antral follicle count; POSEIDON, Patient-Oriented Strategies Encompassing Individualized Oocyte Number; bFSH, baseline follicle-stimulating hormone; bLH, baseline luteinizing hormone.

**Supplementary Table 2a** Univariable and Multivariable Analysis of Factors Associated with Oocytes Retrieved Per Initiated Cycle

| **Variable** | **Univariate Analysis** | | **Multivariate Analysis** | |
| --- | --- | --- | --- | --- |
| **β [95% CI]** | ***p*** | **β [95% CI]** | ***p*** |
| **Protocol** | | | | |
| GnRH antagonist protocol (Ref) | 1.00 | | 1.00 | |
| Mild stimulation protocol | -2.83 [-3.37, -2.29] | ＜ 0.001 | -1.42 [-1.95, -0.90] | ＜ 0.001 |
| PPOS protocol | -2.10 [-2.72, -1.48] | ＜ 0.001 | -0.99 [-1.56, -0.41] | ＜ 0.001 |
| **Infertility type** | | | | |
| primary infertility (Ref) | 1.00 | | 1.00 | |
| secondary infertility | -0.40 [-0.91, 0.12] | 0.131 | / | / |
| **Age** | -0.16 [-0.20, -0.11] | ＜ 0.001 | -0.06 [-0.10, -0.02] | 0.006 |
| **Infertility** **duration** | -0.06 [-0.15, 0.03] | 0.164 | / | / |
| **AMH** | 2.71 [2.17, 3.24] | ＜ 0.001 | 1.81 [1.31, 2.30] | ＜ 0.001 |
| **AFC** | 0.44 [0.37, 0.51] | ＜ 0.001 | 0.30 [0.23, 0.37] | ＜ 0.001 |
| **BMI** | 0.03 [-0.05, 0.10] | 0.453 | / | / |
| **bFSH** | -0.10 [-0.13, -0.07] | ＜ 0.001 | / | / |
| **bLH** | -6.86×10⁻⁴ [-1.89×10⁻3, 5.21×10⁻⁴] | 0.265 | / | / |
| **bE₂** | -2.36×10⁻⁴ [-1.92×10⁻3, 1.46×10⁻3] | 0.784 | / | / |
| **POSEIDON group** | | | | |
| POSEIDON group 3 (Ref) | 1.00 | | 1.00 | |
| POSEIDON group 4 | -1.42 [-1.92, -0.922] | ＜ 0.001 | / | / |

Notes:

Data are presented as β coefficient with 95% confidence interval (CI) Ref, reference group. /, variable not included in the final multivariable model.

The final model was derived via backward stepwise selection from candidate variables (*p* < 0.2 in univariable analysis) with the protocol variable forced for retention.

Abbreviations: CI, confidence interval; Ref, reference; AMH, Anti-Müllerian Hormone; AFC, antral follicle count; BMI, body mass index; bFSH, baseline follicle-stimulating hormone; bLH, baseline luteinizing hormone; bE₂, baseline estradiol; POSEIDON, Patient-Oriented Strategies Encompassing Individualized Oocyte Number.

**Supplementary Table 2b** Assessment of Multicollinearity among Candidate Variables for Oocytes Retrieved Per Initiated Cycle

| **Variable** | **GVIF** | **Df** | **GVIF^[1/(2×Df)]** |
| --- | --- | --- | --- |
| Infertility type | 1.176693 | 1 | 1.084755 |
| Protocol | 1.250493 | 2 | 1.057476 |
| AMH | 1.212535 | 1 | 1.101152 |
| AFC | 1.279868 | 1 | 1.131313 |
| Age | 3.183482 | 1 | 1.784232 |
| POSEIDON group | 3.036679 | 1 | 1.742607 |
| Infertility duration | 1.033051 | 1 | 1.016391 |
| bFSH | 1.224187 | 1 | 1.10643 |

Note:

Multicollinearity assessment of candidate variables (*p* < 0.2 in univariable analysis). GVIF^[1/(2×Df)] represent the adjusted GVIF, with values < 5 indicating no substantial multicollinearity.

Abbreviations: GVIF, generalized variance inflation factor; Df, degrees of freedom; AMH,

Anti-Müllerian Hormone; AFC, antral follicle count; POSEIDON, Patient-Oriented Strategies Encompassing Individualized Oocyte Number; bFSH, baseline follicle-stimulating hormone.

**Supplementary Table 3a** Univariable and Multivariable Analysis of Factors Associated with Usable Embryos Per Initiated Cycle

| **Variable** | **Univariate Analysis** | | **Multivariate Analysis** | |
| --- | --- | --- | --- | --- |
| **β [95% CI]** | ***p*** | **β [95% CI]** | ***p*** |
| **Protocol** | | | | |
| GnRH antagonist protocol (Ref) | 1.00 | | 1.00 | |
| Mild stimulation protocol | -1.67 [-2.06, -1.28] | ＜ 0.001 | -0.97 [-1.38, -0.56] | ＜ 0.001 |
| PPOS protocol | -1.17 [-1.62, -0.73] | ＜ 0.001 | -0.62 [-1.07, -0.17] | 0.007 |
| **Infertility type** | | | | |
| primary infertility (Ref) | 1.00 | | 1.00 | |
| secondary infertility | -0.12 [-0.48, 0.25] | 0.535 | / | / |
| **Age** | -0.10 [-0.13, -0.06] | ＜ 0.001 | -0.04 [-0.08, -0.01] | 0.012 |
| **Infertility** **duration** | -0.05 [-0.11, 0.02] | 0.140 | / | / |
| **AMH** | 1.40 [1.00, 1.84] | ＜ 0.001 | 0.79 [0.38, 1.21] | ＜ 0.001 |
| **AFC** | 0.20 [0.15, 0.25] | ＜ 0.001 | 0.11 [0.05, 0.17] | ＜ 0.001 |
| **BMI** | 0.02 [-0.04, 0.07] | 0.515 | / | / |
| **bFSH** | -0.06 [-0.09, -0.04] | ＜ 0.001 | -0.03 [-0.05, -2.13×10⁻4] | 0.048 |
| **bLH** | -0.02 [-0.05, 0.01] | 0.121 | / | / |
| **bE₂** | -1.17×10⁻⁴ [-5.48×10⁻4, 3.14×10⁻4] | 0.595 | / | / |
| **POSEIDON group** | | | | |
| POSEIDON group 3 (Ref) | 1.00 | | 1.00 | |
| POSEIDON group 4 | -0.83 [-1.19, -0.47] | ＜0.001 | / | / |

Notes:

Data are presented as β coefficient with 95% confidence interval (CI) Ref, reference group. /, variable not included in the final multivariable model.

The final model was derived via backward stepwise selection from candidate variables (*p* < 0.2 in univariable analysis) with the protocol variable forced for retention.

Abbreviations: CI, confidence interval; Ref, reference; AMH, Anti-Müllerian Hormone; AFC, antral follicle count; BMI, body mass index; bFSH, baseline follicle-stimulating hormone; bLH, baseline luteinizing hormone; bE₂, baseline estradiol; POSEIDON, Patient-Oriented Strategies Encompassing Individualized Oocyte Number.

**Supplementary Table 3b** Assessment of Multicollinearity among Candidate Variables for Usable Embryos Per Initiated Cycle

| **Variable** | **GVIF** | **Df** | **GVIF^[1/(2×Df)** |
| --- | --- | --- | --- |
| Protocol | 1.253957 | 2 | 1.058207 |
| AMH | 1.212311 | 1 | 1.10105 |
| AFC | 1.250443 | 1 | 1.118232 |
| Age | 3.126956 | 1 | 1.76832 |
| POSEIDON group | 3.019521 | 1 | 1.737677 |
| Infertility duration | 1.021188 | 1 | 1.010538 |
| bFSH | 1.523462 | 1 | 1.234286 |
| bLH | 1.352771 | 1 | 1.163087 |

Note:

Multicollinearity assessment of candidate variables (*p* < 0.2 in univariable analysis). GVIF^[1/(2×Df)] represent the adjusted GVIF, with values < 5 indicating no substantial multicollinearity.

Abbreviations: GVIF, generalized variance inflation factor; Df, degrees of freedom; AMH,

Anti-Müllerian Hormone; AFC, antral follicle count; POSEIDON, Patient-Oriented Strategies Encompassing Individualized Oocyte Number; bFSH, baseline follicle-stimulating hormone; bLH, baseline luteinizing hormone.

**Supplementary Table 4a** Univariable and Multivariable Analysis of Factors Associated with High-quality Embryos Per Initiated Cycle

| **Variable** | **Univariate Analysis** | | **Multivariate Analysis** | |
| --- | --- | --- | --- | --- |
| **β [95% CI]** | ***p*** | **β [95% CI]** | ***p*** |
| **Protocol** | | | | |
| GnRH antagonist protocol (Ref) | 1.00 | | 1.00 | |
| Mild stimulation protocol | -0.76 [-1.01, -0.50] | ＜ 0.001 | -0.55 [-0.82, -0.27] | ＜ 0.001 |
| PPOS protocol | -0.58 [-0.87, -0.29] | ＜ 0.001 | -0.39 [-0.69, -0.09] | 0.010 |
| **Infertility type** | | | | |
| primary infertility (Ref) | 1.00 | | 1.00 | |
| secondary infertility | 0.06 [-0.17, 0.29] | 0.618 | / | / |
| **Age** | -0.03 [-0.05, -3.21×10⁻3] | 0.026 | / | / |
| **Infertility** **duration** | -0.03 [-0.07, 0.01] | 0.171 | / | / |
| **AMH** | 0.48 [0.22, 0.74] | ＜ 0.001 | 0.29 [0.02, 0.55] | 0.032 |
| **AFC** | 0.07 [0.04, 0.11] | ＜ 0.001 | 0.04 [0.01, 0.08] | 0.021 |
| **BMI** | -4.47×10⁻3 [-0.04, 0.03] | 0.791 | / | / |
| **bFSH** | -0.03 [-0.04, -0.01] | 0.008 | / | / |
| **bLH** | -0.01 [-0.02, 0.01] | 0.585 | / | / |
| **bE₂** | -5.35×10⁻5 [-2.20×10⁻4, 3.26×10⁻4] | 0.701 | / | / |
| **POSEIDON group** | | | | |
| POSEIDON group 3 (Ref) | 1.00 | | 1.00 | |
| POSEIDON group 4 | -0.22 [-0.45, 0.01] | 0.066 | / | / |

Notes:

Data are presented as β coefficient with 95% confidence interval (CI) Ref, reference group. /, variable not included in the final multivariable model.

The final model was derived via backward stepwise selection from candidate variables (*p* < 0.2 in univariable analysis) with the protocol variable forced for retention.

Abbreviations: CI, confidence interval; Ref, reference; AMH, Anti-Müllerian Hormone; AFC, antral follicle count; BMI, body mass index; bFSH, baseline follicle-stimulating hormone; bLH, baseline luteinizing hormone; bE₂, baseline estradiol; POSEIDON, Patient-Oriented Strategies Encompassing Individualized Oocyte Number.

**Supplementary Table 4b** Assessment of Multicollinearity among Candidate Variables for High-quality Embryos Per Initiated Cycle

| **Variable** | **GVIF** | **Df** | **GVIF^[1/(2×Df)]** |
| --- | --- | --- | --- |
| Protocol | 1.241735 | 2 | 1.055619 |
| AMH | 1.212302 | 1 | 1.101046 |
| AFC | 1.249071 | 1 | 1.117618 |
| Age | 3.120038 | 1 | 1.766363 |
| POSEIDON group | 3.019517 | 1 | 1.737676 |
| Infertility duration | 1.019865 | 1 | 1.009884 |
| bFSH | 1.184148 | 1 | 1.088186 |

Note:

Multicollinearity assessment of candidate variables (*p* < 0.2 in univariable analysis). GVIF^[1/(2×Df)] represent the adjusted GVIF, with values < 5 indicating no substantial multicollinearity.

Abbreviations: GVIF, generalized variance inflation factor; Df, degrees of freedom; AMH,

Anti-Müllerian Hormone; AFC, antral follicle count; POSEIDON, Patient-Oriented Strategies Encompassing Individualized Oocyte Number; bFSH, baseline follicle-stimulating hormone.

**Supplementary Table 5a** Predictors of Embryo-Unusable Cycle Cancellation Per Initiated Cycle: Univariable and Multivariable Analysis

| **Variable** | **Univariate Analysis** | | **Multivariate Analysis** | |
| --- | --- | --- | --- | --- |
| **OR [95% CI]** | ***p*** | **OR [95% CI]** | ***p*** |
| **Protocol** | | | | |
| GnRH antagonist protocol (Ref) | 1.00 | | 1.00 | |
| Mild stimulation protocol | 3.67 [2.05, 6.94] | ＜ 0.001 | 1.92 [0.99, 3.87] | 0.059 |
| PPOS protocol | 2.72 [1.40, 5.45] | 0.004 | 1.56 [0.75, 3.32] | 0.240 |
| **Infertility type** | | | | |
| primary infertility (Ref) | 1.00 | | 1.00 | |
| secondary infertility | 0.95 [0.61, 1.47] | 0.814 | / | / |
| **Age** | 1.05 [1.01, 1.10] | 0.019 | / | / |
| **Infertility** **duration** | 1.06 [0.99, 1.13] | 0.103 | / | / |
| **AMH** | 0.14 [0.07, 0.26] | ＜ 0.001 | 0.29 [0.14, 0.54] | ＜ 0.001 |
| **AFC** | 0.73 [0.66, 0.81] | ＜ 0.001 | 0.82 [0.73, 0.92] | ＜ 0.001 |
| **BMI** | 1.02 [0.96, 1.08] | 0.498 | / | / |
| **bFSH** | 1.05 [1.02, 1.08] | ＜ 0.001 | / | / |
| **bLH** | 1.02 [1.00, 1.05] | 0.208 | / | / |
| **bE₂** | 1.00 [0.99, 1.00] | 0.346 | / | / |
| **POSEIDON group** | | | | |
| POSEIDON group 3 (Ref) | 1.00 | | 1.00 | |
| POSEIDON group 4 | 1.39 [0.89, 2.19] | 0.149 | / | / |

Notes:

Data are presented as odds ratio (OR) with 95% confidence interval (CI). Ref, reference group. /, variable not included in the final multivariable model.

The final model was derived via backward stepwise selection from candidate variables (*p* < 0.2 in univariable analysis) with the protocol variable forced for retention.

Abbreviations: OR, odds ratio; CI, confidence interval; Ref, reference; AMH, Anti-Müllerian Hormone; AFC, antral follicle count; BMI, body mass index; bFSH, baseline follicle-stimulating hormone; bLH, baseline luteinizing hormone; bE₂, baseline estradiol; POSEIDON, Patient-Oriented Strategies Encompassing Individualized Oocyte Number.

**Supplementary Table 5b** Assessment of Multicollinearity among Candidate Variables for Embryo-Unusable Cycle Cancellation Per Initiated Cycle

| **Variable** | **GVIF** | **Df** | **GVIF^[1/(2×Df)]** |
| --- | --- | --- | --- |
| Protocol | 1.138671 | 2 | 1.032998 |
| AMH | 1.299098 | 1 | 1.13978 |
| AFC | 1.294423 | 1 | 1.137727 |
| Age | 3.019612 | 1 | 1.737703 |
| POSEIDON group | 2.950356 | 1 | 1.71766 |
| Infertility duration | 1.043051 | 1 | 1.021299 |
| bFSH | 1.25512 | 1 | 1.120321 |

Note:

Multicollinearity assessment of candidate variables (*p* < 0.2 in univariable analysis). GVIF^[1/(2×Df)] represent the adjusted GVIF, with values < 5 indicating no substantial multicollinearity.

Abbreviations: GVIF, generalized variance inflation factor; Df, degrees of freedom; AMH,

Anti-Müllerian Hormone; AFC, antral follicle count; POSEIDON, Patient-Oriented Strategies Encompassing Individualized Oocyte Number; bFSH, baseline follicle-stimulating hormone.

**Supplementary Table 6a** Univariable and Multivariable Analysis of Factors Associated with Premature LH Surge Rate per Initiated Cycle

| **Variable** | **Univariate Analysis** | | **Multivariate Analysis** | |
| --- | --- | --- | --- | --- |
| **OR [95% CI]** | ***p*** | **OR [95% CI]** | ***p*** |
| **Protocol** | | | | |
| GnRH antagonist protocol (Ref) | 1.00 | | 1.00 | |
| Mild stimulation protocol | 7.31 [2.51, 31.07] | 0.001 | 4.24 [1.38, 18.58] | 0.024 |
| PPOS protocol | 1.40 [0.26, 7.65] | 0.684 | 0.82 [0.15, 4.66] | 0.819 |
| **Infertility type** | | | | |
| primary infertility (Ref) | 1.00 | | 1.00 | |
| secondary infertility | 0.96 [0.46, 2.04] | 0.920 | / | / |
| **Age** | 1.02 [0.95, 1.09] | 0.610 | / | / |
| **Infertility** **duration** | 1.02 [0.89, 1.14] | 0.761 | / | / |
| **AMH** | 0.08 [0.03, 0.25] | ＜ 0.001 | 0.11 [0.03, 0.36] | ＜ 0.001 |
| **AFC** | 0.72 [0.60, 0.86] | ＜0.001 | / | / |
| **BMI** | 1.06 [0.96, 1.16] | 0.215 | / | / |
| **bFSH** | 1.04 [1.01, 1.07] | 0.004 | / | / |
| **bLH** | 0.99 [0.98, 1.01] | 0.867 | / | / |
| **bE₂** | 0.99 [0.99, 1.01] | 0.588 | / | / |
| **POSEIDON group** | | | | |
| POSEIDON group 3 (Ref) | 1.00 | | 1.00 | |
| POSEIDON group 4 | 0.94 [0.45, 1.99] | 0.875 | / | / |

Notes:

Data are presented as odds ratio (OR) with 95% confidence interval (CI). Ref, reference group. /, variable not included in the final multivariable model.

The final model was derived via backward stepwise selection from candidate variables (*p* < 0.2 in univariable analysis) with the protocol variable forced for retention.

Abbreviations: OR, odds ratio; CI, confidence interval; Ref, reference; AMH, Anti-Müllerian Hormone; AFC, antral follicle count; BMI, body mass index; bFSH, baseline follicle-stimulating hormone; bLH, baseline luteinizing hormone; bE₂, baseline estradiol; POSEIDON, Patient-Oriented Strategies Encompassing Individualized Oocyte Number.

**Supplementary Table 6b** Assessment of Multicollinearity among Candidate Variables for Premature LH Surge Rate per Initiated Cycle

| **Variable** | **GVIF** | **Df** | **GVIF^[1/(2×Df)]** |
| --- | --- | --- | --- |
| Protocol | 1.206774 | 2 | 1.048109 |
| AMH | 1.330372 | 1 | 1.153418 |
| AFC | 1.3458 | 1 | 1.160086 |
| bFSH | 1.336964 | 1 | 1.156272 |

Note:

Multicollinearity assessment of candidate variables (*p* < 0.2 in univariable analysis). GVIF^[1/(2×Df)] represent the adjusted GVIF, with values < 5 indicating no substantial multicollinearity.

Abbreviations: GVIF, generalized variance inflation factor; Df, degrees of freedom; AMH,

Anti-Müllerian Hormone; AFC, antral follicle count; bFSH, baseline follicle-stimulating hormone.

**Supplementary Table 7a** Predictors of Clinical Pregnancy Rate from First Embryo Transfer: Univariable and Multivariable Analysis

| **Variable** | **Univariate Analysis** | | **Multivariate Analysis** | |
| --- | --- | --- | --- | --- |
| **OR [95% CI]** | ***p*** | **OR [95% CI]** | ***p*** |
| **Protocol** | | | | |
| GnRH antagonist protocol (Ref) | 1.00 | | 1.00 | |
| Mild stimulation protocol | 0.86 [0.57, 1.29] | 0.462 | 1.05 [0.68, 1.63] | 0.822 |
| PPOS protocol | 1.09 [0.67, 1.73] | 0.710 | 1.26 [0.78, 2.04] | 0.345 |
| **Infertility type** | | | | |
| primary infertility (Ref) | 1.00 | | 1.00 | |
| secondary infertility | 0.74 [0.51, 1.06] | 0.098 | / | / |
| **Age** | 0.92 [0.88, 0.95] | ＜ 0.001 | 0.92 [0.88, 0.95] | ＜ 0.001 |
| **Infertility** **duration** | 0.97 [0.91, 1.04] | 0.410 | / | / |
| **AMH** | 1.32 [0.87, 2.01] | 0.188 | / | / |
| **AFC** | 1.03 [0.98, 1.09] | 0.220 | / | / |
| **BMI** | 0.99 [0.94, 1.04] | 0.737 | / | / |
| **bFSH** | 0.99 [0.95, 1.01] | 0.344 | / | / |
| **bLH** | 0.99 [0.96, 1.02] | 0.663 | / | / |
| **bE₂** | 0.99 [0.99, 1.01] | 0.503 | / | / |
| **POSEIDON group** | | | | |
| POSEIDON group 3 (Ref) | 1.00 | | 1.00 | |
| POSEIDON group 4 | 0.49 [0.34, 0.71] | ＜ 0.001 | / | / |

Notes:

Data are presented as odds ratio (OR) with 95% confidence interval (CI). Ref, reference group. /, variable not included in the final multivariable model.

The final model was derived via backward stepwise selection from candidate variables (*p* < 0.2 in univariable analysis) with the protocol variable forced for retention.

Abbreviations: OR, odds ratio; CI, confidence interval; Ref, reference; AMH, Anti-Müllerian Hormone; AFC, antral follicle count; BMI, body mass index; bFSH, baseline follicle-stimulating hormone; bLH, baseline luteinizing hormone; bE₂, baseline estradiol; POSEIDON, Patient-Oriented Strategies Encompassing Individualized Oocyte Number.

**Supplementary Table 7b** Assessment of Multicollinearity among Candidate Variables for Clinical Pregnancy Rate in the First Embryo Transfer

| **Variable** | **GVIF** | **Df** | **GVIF^[1/(2×Df)]** |
| --- | --- | --- | --- |
| Infertility type | 1.13878 | 1 | 1.067136 |
| AMH | 1.089482 | 1 | 1.043782 |
| Age | 3.182008 | 1 | 1.783818 |
| POSEIDON group | 3.069049 | 1 | 1.75187 |
| Protocol | 1.117847 | 2 | 1.028243 |

Note:

Multicollinearity assessment of candidate variables (*p* < 0.2 in univariable analysis). GVIF^[1/(2×Df)] represent the adjusted GVIF, with values < 5 indicating no substantial multicollinearity.

Abbreviations: GVIF, generalized variance inflation factor; Df, degrees of freedom; AMH,

Anti-Müllerian Hormone; POSEIDON, Patient-Oriented Strategies Encompassing Individualized Oocyte Number.

**Supplementary Table 8a** Predictors of Live Birth Rate from First Embryo Transfer: Univariable and Multivariable Analysis

| **Variable** | **Univariate Analysis** | | **Multivariate Analysis** | |
| --- | --- | --- | --- | --- |
| **OR [95% CI]** | ***p*** | **OR [95% CI]** | ***p*** |
| **Protocol** | | | | |
| GnRH antagonist protocol (Ref) | 1.00 | | 1.00 | |
| Mild stimulation protocol | 0.81 [0.53, 1.24] | 0.329 | 0.98 [0.63, 1.53] | 0.927 |
| PPOS protocol | 1.07 [0.67, 1.72] | 0.773 | 1.23 [0.76, 2.01] | 0.397 |
| **Infertility type** | | | | |
| primary infertility (Ref) | 1.00 | | 1.00 | |
| secondary infertility | 0.76 [0.51, 1.08] | 0.119 | / | / |
| **Age** | 0.92 [0.88, 0.95] | ＜ 0.001 | 0.92 [0.88, 0.95] | ＜ 0.001 |
| **Infertility** **duration** | 0.96 [0.89, 1.01] | 0.237 | / | / |
| **AMH** | 1.31 [0.86, 2.01] | 0.211 | / | / |
| **AFC** | 1.04 [0.98, 1.10] | 0.154 | / | / |
| **BMI** | 0.98 [0.93, 1.04] | 0.533 | / | / |
| **bFSH** | 0.98 [0.95, 1.01] | 0.315 | / | / |
| **bLH** | 0.98 [0.94, 1.02] | 0.442 | / | / |
| **bE₂** | 0.99 [0.98, 1.01] | 0.269 | / | / |
| **POSEIDON group** | | | | |
| POSEIDON group 3 (Ref) | 1.00 | | 1.00 | |
| POSEIDON group 4 | 0.46 [0.32, 0.67] | ＜ 0.001 | / | / |

Notes:

Data are presented as odds ratio (OR) with 95% confidence interval (CI). Ref, reference group. /, variable not included in the final multivariable model.

The final model was derived via backward stepwise selection from candidate variables (*p* < 0.2 in univariable analysis) with the protocol variable forced for retention.

Abbreviations: OR, odds ratio; CI, confidence interval; Ref, reference; AMH, Anti-Müllerian Hormone; AFC, antral follicle count; BMI, body mass index; bFSH, baseline follicle-stimulating hormone; bLH, baseline luteinizing hormone; bE₂, baseline estradiol; POSEIDON, Patient-Oriented Strategies Encompassing Individualized Oocyte Number.

**Supplementary Table 8b** Assessment of Multicollinearity among Candidate Variables for Live Birth Rate in the First Embryo Transfer

| **Variable** | **GVIF** | **Df** | **GVIF^[1/(2×Df)]** |
| --- | --- | --- | --- |
| Infertility duration | 1.145046 | 1 | 1.070068 |
| AFC | 1.188877 | 1 | 1.090356 |
| Age | 3.234408 | 1 | 1.798446 |
| POSEIDON group | 3.130245 | 1 | 1.76925 |
| Protocol | 1.184233 | 2 | 1.04318 |

Note:

Multicollinearity assessment of candidate variables (*p* < 0.2 in univariable analysis). GVIF^[1/(2×Df)] represent the adjusted GVIF, with values < 5 indicating no substantial multicollinearity.

Abbreviations: GVIF, generalized variance inflation factor; Df, degrees of freedom; AFC, antral follicle count; POSEIDON, Patient-Oriented Strategies Encompassing Individualized Oocyte Number.

**Supplementary Table 9a** Predictors of Positive Pregnancy Test Rate from First Embryo Transfer: Univariable and Multivariable Analysis

| **Variable** | **Univariate Analysis** | | **Multivariate Analysis** | |
| --- | --- | --- | --- | --- |
| **OR [95% CI]** | ***p*** | **OR [95% CI]** | ***p*** |
| **Protocol** | | | | |
| GnRH antagonist protocol (Ref) | 1.00 | | 1.00 | |
| Mild stimulation protocol | 1.41 [0.94, 2.12] | 0.099 | 1.79 [1.16, 2.78] | 0.009 |
| PPOS protocol | 1.41 [0.89, 2.25] | 0.143 | 1.60 [0.99, 2.60] | 0.054 |
| **Infertility type** | | | | |
| primary infertility (Ref) | 1.00 | | 1.00 | |
| secondary infertility | 0.66 [0.46, 0.95] | 0.025 | / | / |
| **Age** | 0.93 [0.90, 0.97] | ＜ 0.001 | 0.92 [0.88, 0.95] | ＜ 0.001 |
| **Infertility** **duration** | 0.96 [0.91, 1.03] | 0.259 | / | / |
| **AMH** | 1.33 [0.88, 2.03] | 0.183 | / | / |
| **AFC** | 1.01 [0.96, 1.07] | 0.687 | / | / |
| **BMI** | 1.00 [0.95, 1.05] | 0.898 | / | / |
| **bFSH** | 1.01 [0.98, 1.04] | 0.500 | / | / |
| **bLH** | 1.00 [0.97, 1.04] | 0.811 | / | / |
| **bE₂** | 1.00 [0.99, 1.01] | 0.537 | / | / |
| **POSEIDON group** | | | | |
| POSEIDON group 3 (Ref) | 1.00 | | 1.00 | |
| POSEIDON group 4 | 0.60 [0.42, 0.85] | 0.005 | / | / |

Notes:

Data are presented as odds ratio (OR) with 95% confidence interval (CI). Ref, reference group. /, variable not included in the final multivariable model.

The final model was derived via backward stepwise selection from candidate variables (*p* < 0.2 in univariable analysis) with the protocol variable forced for retention.

Abbreviations: OR, odds ratio; CI, confidence interval; Ref, reference; AMH, Anti-Müllerian Hormone; AFC, antral follicle count; BMI, body mass index; bFSH, baseline follicle-stimulating hormone; bLH, baseline luteinizing hormone; bE₂, baseline estradiol; POSEIDON, Patient-Oriented Strategies Encompassing Individualized Oocyte Number.

**Supplementary Table 9b** Assessment of Multicollinearity among Candidate Variables for Positive Pregnancy Test Rate in the First Embryo Transfer

| **Variable** | **GVIF** | **Df** | **GVIF^[1/(2×Df)]** |
| --- | --- | --- | --- |
| Infertility type | 1.125617 | 1 | 1.060951 |
| Protocol | 1.149462 | 2 | 1.035437 |
| AMH | 1.103386 | 1 | 1.050422 |
| Age | 3.136978 | 1 | 1.771152 |
| POSEIDON group | 3.010498 | 1 | 1.735079 |

Note:

Multicollinearity assessment of candidate variables (*p* < 0.2 in univariable analysis). GVIF^[1/(2×Df)] represent the adjusted GVIF, with values < 5 indicating no substantial multicollinearity.

Abbreviations: GVIF, generalized variance inflation factor; Df, degrees of freedom; AMH,

Anti-Müllerian Hormone; Patient-Oriented Strategies Encompassing Individualized Oocyte Number.

**Supplementary Table 10a** Predictors of Miscarriage Rate from First Embryo Transfer: Univariable and Multivariable Analysis

| **Variable** | **Univariate Analysis** | | **Multivariate Analysis** | |
| --- | --- | --- | --- | --- |
| **OR [95% CI]** | ***p*** | **OR [95% CI]** | ***p*** |
| **Protocol** | | | | |
| GnRH antagonist protocol (Ref) | 1.00 | | 1.00 | |
| Mild stimulation protocol | 1.56 [0.62, 4.05] | 0.352 | 1.55 [0.61, 4.06] | 0.358 |
| PPOS protocol | 1.38 [0.49, 3.88] | 0.535 | 1.25 [0.42, 3.59] | 0.678 |
| **Infertility type** | | | | |
| primary infertility (Ref) | 1.00 | | 1.00 | |
| secondary infertility | 0.79 [0.35, 1.73] | 0.548 | / | / |
| **Age** | 1.07 [0.98, 1.17] | 0.133 | / | / |
| **Infertility** **duration** | 1.05 [0.92, 1.19] | 0.413 | / | / |
| **AMH** | 1.00 [0.33, 2.80] | 0.996 | / | / |
| **AFC** | 0.94 [0.81, 1.06] | 0.328 | / | / |
| **BMI** | 1.06 [0.94, 1.17] | 0.321 | / | / |
| **bFSH** | 1.02 [0.94, 1.07] | 0.624 | / | / |
| **bLH** | 1.05 [0.96, 1.14] | 0.216 | / | / |
| **bE₂** | 0.99 [1.00, 1.01] | 0.044 | 0.99 [1.00, 1.01] | 0.045 |
| **POSEIDON group** | | | | |
| POSEIDON group 3 (Ref) | 1.00 | | 1.00 | |
| POSEIDON group 4 | 1.76 [0.80, 3.94] | 0.161 | / | / |

Notes:

Data are presented as odds ratio (OR) with 95% confidence interval (CI). Ref, reference group. /, variable not included in the final multivariable model.

The final model was derived via backward stepwise selection from candidate variables (*p* < 0.2 in univariable analysis) with the protocol variable forced for retention.

Abbreviations: OR, odds ratio; CI, confidence interval; Ref, reference; AMH, Anti-Müllerian Hormone; AFC, antral follicle count; BMI, body mass index; bFSH, baseline follicle-stimulating hormone; bLH, baseline luteinizing hormone; bE₂, baseline estradiol; POSEIDON, Patient-Oriented Strategies Encompassing Individualized Oocyte Number.

**Supplementary Table 10b** Assessment of Multicollinearity among Candidate Variables for Miscarriage Rate in the First Embryo Transfer

| **Variable** | **GVIF** | **Df** | **GVIF^[1/(2×Df)]** |
| --- | --- | --- | --- |
| Age | 3.357355 | 1 | 1.832309 |
| POSEIDON group | 3.301288 | 1 | 1.816945 |
| bE₂ | 1.010045 | 1 | 1.00501 |
| Protocol | 1.057036 | 2 | 1.013964 |

Note:

Multicollinearity assessment of candidate variables (*p* < 0.2 in univariable analysis). GVIF^[1/(2×Df)] represent the adjusted GVIF, with values < 5 indicating no substantial multicollinearity.

Abbreviations: GVIF, generalized variance inflation factor; Df, degrees of freedom; POSEIDON, Patient-Oriented Strategies Encompassing Individualized Oocyte Number; bE₂, baseline estradiol.

**Supplementary Table 11a** Predictors of Biochemical Pregnancy Rate from First Embryo Transfer: Univariable and Multivariable Analysis

| **Variable** | **Univariate Analysis** | | **Multivariate Analysis** | |
| --- | --- | --- | --- | --- |
| **OR [95% CI]** | ***p*** | **OR [95% CI]** | ***p*** |
| **Protocol** | | | | |
| GnRH antagonist protocol (Ref) | 1.00 | | 1.00 | |
| Mild stimulation protocol | 3.19 [1.67, 6.45] | ＜ 0.001 | 3.19 [1.67, 6.45] | ＜ 0.001 |
| PPOS protocol | 2.07 [0.96, 4.55] | 0.064 | 2.07 [0.96, 4.55] | 0.064 |
| **Infertility type** | | | | |
| primary infertility (Ref) | 1.00 | | 1.00 | |
| secondary infertility | 0.79 [0.47, 1.33] | 0.367 | / | / |
| **Age** | 1.02 [0.97, 1.07] | 0.467 | / | / |
| **Infertility** **duration** | 0.98 [0.88, 1.07] | 0.962 | / | / |
| **AMH** | 1.01 [0.54, 1.82] | 0.996 | / | / |
| **AFC** | 0.95 [0.86, 1.03] | 0.230 | / | / |
| **BMI** | 1.01 [0.94, 1.09] | 0.765 | / | / |
| **bFSH** | 1.03 [1.00, 1.06] | 0.035 | / | / |
| **bLH** | 1.02 [0.98, 1.05] | 0.347 | / | / |
| **bE₂** | 1.00 [0.99, 1.01] | 0.167 | / | / |
| **POSEIDON group** | | | | |
| POSEIDON group 3 (Ref) | 1.00 | | 1.00 | |
| POSEIDON group 4 | 1.46 [0.86, 2.53] | 0.161 | / | / |

Notes:

Data are presented as odds ratio (OR) with 95% confidence interval (CI). Ref, reference group. /, variable not included in the final multivariable model.

The final model was derived via backward stepwise selection from candidate variables (*p* < 0.2 in univariable analysis) with the protocol variable forced for retention.

Abbreviations: OR, odds ratio; CI, confidence interval; Ref, reference; AMH, Anti-Müllerian Hormone; AFC, antral follicle count; BMI, body mass index; bFSH, baseline follicle-stimulating hormone; bLH, baseline luteinizing hormone; bE₂, baseline estradiol; POSEIDON, Patient-Oriented Strategies Encompassing Individualized Oocyte Number.

**Supplementary Table 11b** Assessment of Multicollinearity among Candidate Variables for Biochemical Pregnancy Rate in the First Embryo Transfer

| **Variable** | **GVIF** | **Df** | **GVIF^[1/(2×Df)]** |
| --- | --- | --- | --- |
| Protocol | 1.056245 | 2 | 1.013774 |
| POSEIDON group | 1.024247 | 1 | 1.012051 |
| bFSH | 1.04203 | 1 | 1.020799 |
| bE₂ | 1.012082 | 1 | 1.006023 |

Note:

Multicollinearity assessment of candidate variables (*p* < 0.2 in univariable analysis). GVIF^[1/(2×Df)] represent the adjusted GVIF, with values < 5 indicating no substantial multicollinearity.

Abbreviations: GVIF, generalized variance inflation factor; Df, degrees of freedom;

POSEIDON, Patient-Oriented Strategies Encompassing Individualized Oocyte Number; bFSH, baseline follicle-stimulating hormone; bE₂, baseline estradiol.

**Supplementary Table 12** Univariable Analysis of Variables Associated with Multiple Pregnancy Rate in the First Embryo Transfer

| **Variable** | **Univariate Analysis** | |
| --- | --- | --- |
| **OR [95% CI]** | ***p*** |
| **Protocol** | | |
| GnRH antagonist protocol (Ref) | 1.00 | |
| Mild stimulation protocol | 1.22 [0.54, 2.77] | 0.628 |
| PPOS protocol | 0.48 [0.15, 1.36] | 0.190 |
| **Infertility type** | | |
| primary infertility (Ref) | 1.00 | |
| secondary infertility | 1.33 [0.63, 2.82] | 0.453 |
| **Age** | 1.03 [0.95, 1.11] | 0.520 |
| **Infertility** **duration** | 0.99 [0.86, 1.12] | 0.939 |
| **AMH** | 0.67 [0.24, 1.78] | 0.433 |
| **AFC** | 1.05 [0.93, 1.16] | 0.418 |
| **BMI** | 1.05 [0.94, 1.16] | 0.389 |
| **bFSH** | 0.98 [0.87, 1.04] | 0.427 |
| **bLH** | 0.98 [0.87, 1.08] | 0.763 |
| **bE₂** | 1.00 [0.99, 1.01] | 0.435 |
| **POSEIDON group** | | |
| POSEIDON group 3 (Ref) | 1.00 | |
| POSEIDON group 4 | 1.21 [0.57, 2.54] | 0.613 |

Notes:

Data are presented as odds ratio (OR) with 95% confidence interval (CI). Ref, reference group.

No variables reached the pre-specified threshold of *p* < 0.2 in univariable analysis for inclusion in a multivariable model.

Abbreviations: OR, odds ratio; CI, confidence interval; Ref, reference; AMH, Anti-Müllerian Hormone; AFC, antral follicle count; BMI, body mass index; bFSH, baseline follicle-stimulating hormone; bLH, baseline luteinizing hormone; bE₂, baseline estradiol; POSEIDON, Patient-Oriented Strategies Encompassing Individualized Oocyte Number.
